# Supplementary material for: Functional landscape of ubiquitin linkages couples K29-linked ubiquitylation to epigenome integrity
Source: Springer Nature journal article supplement (doi:10.1038/s44318-025-00599-7), 2025-10-22
Supplement: MOESM1 [file 44318_2025_599_moesm1_esm.pdf › 44318_2025_599_moesm1_esm.pdf]

Appendix for:

**Functional landscape of ubiquitin linkages couples K29-linked ubiquitylation to epigenome integrity**

Javier Arroyo-Gomez<sup>1</sup>, Matthew J. Murray<sup>1,2</sup>, Claire Guérillon<sup>1,2</sup>, Juanjuan Wang<sup>1</sup>, Ekaterina Isaakova<sup>3</sup>, Nazaret Reverón-Gómez<sup>1,2</sup>, Mikaela Koutrouli<sup>1</sup>, Aldwin Suryo Rahmanto<sup>3</sup>, Katrine Mitrofanov<sup>1</sup>, Andreas Ingham<sup>1</sup>, Sofie Schovsbo<sup>1</sup>, Katrine Weischenfeldt<sup>1,2</sup>, Fabian Coscia<sup>1,4</sup>, Dimitris Typas<sup>1</sup>, Moritz Völker-Albert<sup>5</sup>, Victor Solis<sup>5</sup>, Lars Juhl Jensen<sup>1</sup>, Anja Groth<sup>1,2</sup>, Andreas Mund<sup>1</sup>, Petra Beli<sup>3</sup>, Robert F Shearer<sup>1</sup>, and Niels Mailand<sup>1,2</sup>

*<sup>1</sup>Novo Nordisk Foundation Center for Protein Research, University of Copenhagen, 2200 Copenhagen, Denmark; <sup>2</sup>Danish Cancer Institute, Danish Cancer Society, Copenhagen, 2100 Copenhagen, Denmark; <sup>3</sup>Institute of Molecular Biology, 55218 Mainz, Germany; <sup>4</sup>Max Delbrück Center for Molecular Medicine, Berlin, Germany; <sup>5</sup>EpiQMAx GmbH, Planegg, Germany*

## **Table of contents**

|                    |        |
|--------------------|--------|
| Appendix Figure S1 | Page 3 |
|--------------------|--------|

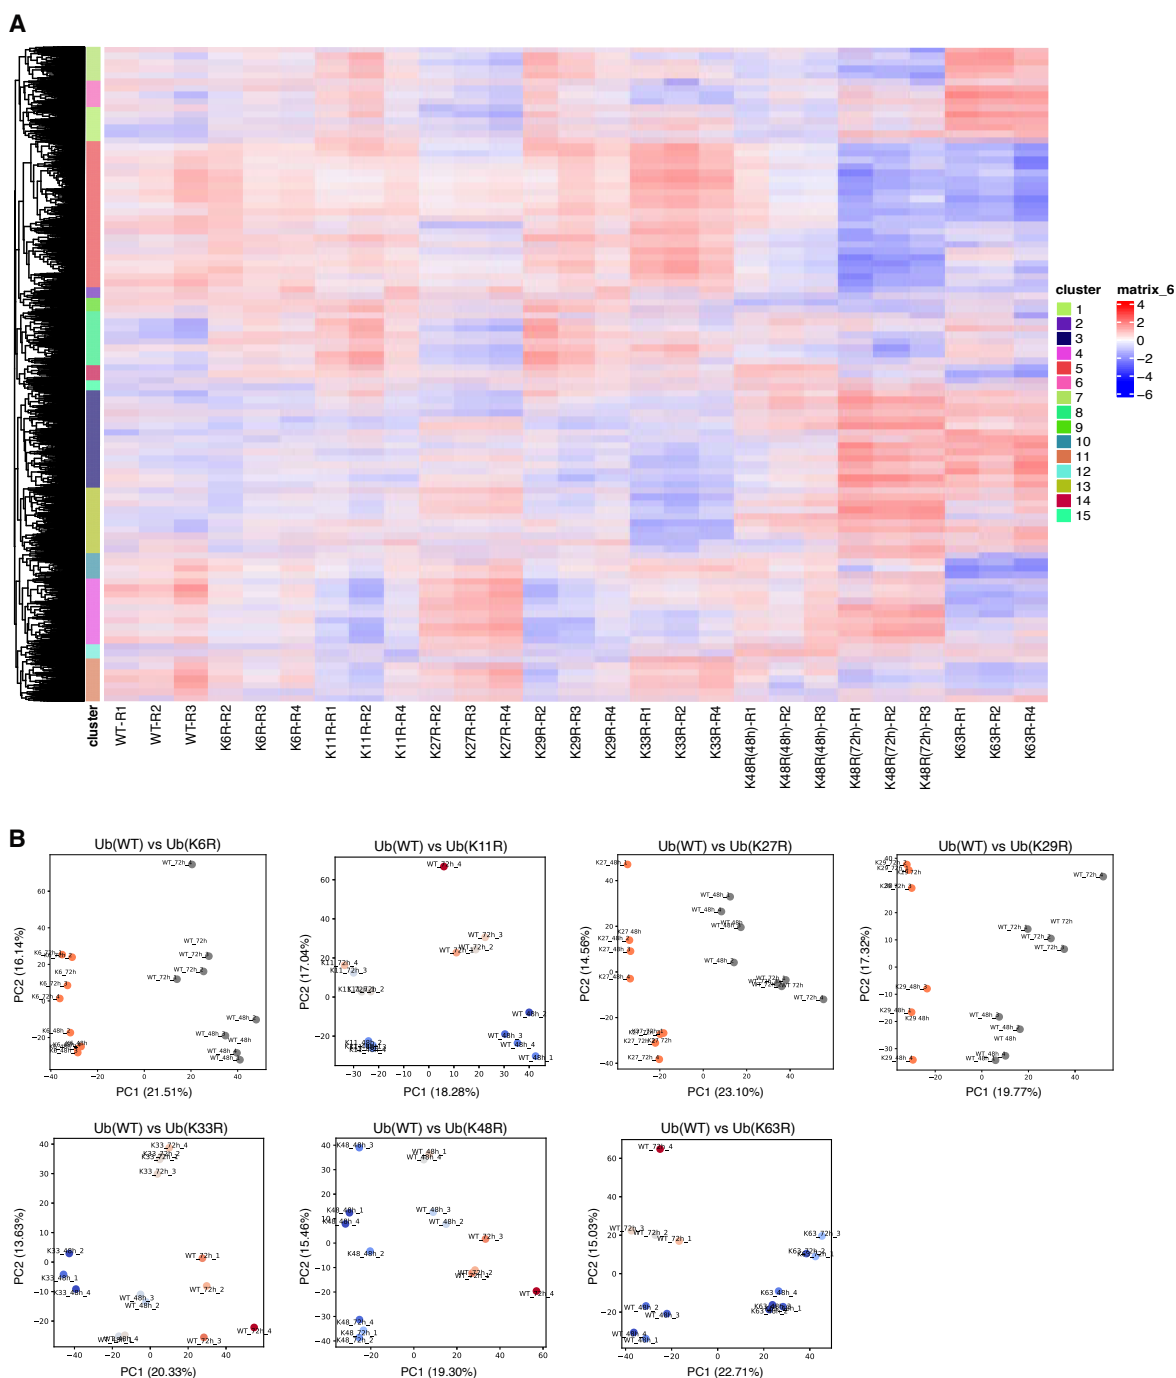

**Appendix Figure S1.**  
**Extended data related to Figure 2**

**A.** Heatmap comparison of whole proteome analyses of individual replicates from indicated Ub replacement cell lines treated with DOX for 72 h (48 or 72 h in the case of Ub(K48R) cells). See Table EV2 for full results.

**B.** Principal component analysis clustering of samples analyzed by MS after enrichment of HA-Ub conjugates from Ub replacement cell lines under denaturing conditions (Figure 2A-H).
