# Supplementary material for: Functional landscape of ubiquitin linkages couples K29-linked ubiquitylation to epigenome integrity
Source: EMBO J. 2025 Oct 22;44(23):6944–78. doi: 10.1038/s44318-025-00599-7 (PMC12669653; doi:10.1038/s44318-025-00599-7)
Supplement: Supplementary file 3 — Dataset EV1 [file 44318_2025_599_MOESM3_ESM.xlsx]

## Sheet: Description
Dataset EV1
MS analysis of diGly-modified Ub peptides from Ub(WT)- and Ub(K-to-R)-replaced cells

## Sheet: Ub linkages Ub-replaced cells
Gene.name	variable	Rep	Linkage	Intensity
UBB;UBC;RPS27A;UBA52_(K29)	Intensity.WT	Rep1	29	4.61E+07
UBB;UBC;RPS27A;UBA52_(K33)	Intensity.WT	Rep1	33	1.42E+07
UBB;UBC;UBA52;RPS27A_(K48)	Intensity.WT	Rep1	48	3.74E+10
UBB;UBC;UBA52;RPS27A_(K63)	Intensity.WT	Rep1	63	2.86E+10
UBB;UBC;RPS27A;UBA52_(K6)	Intensity.WT	Rep1	6	1.11E+07
UBB;UBC;RPS27A;UBA52_(K11)	Intensity.WT	Rep1	11	8.55E+09
UBB;UBC;RPS27A;UBA52_(K27)	Intensity.WT	Rep1	27	3.93E+08
UBB;UBC;RPS27A;UBA52_(K29)	Intensity.WT	Rep2	29	9.22E+07
UBB;UBC;RPS27A;UBA52_(K33)	Intensity.WT	Rep2	33	1.41E+07
UBB;UBC;UBA52;RPS27A_(K48)	Intensity.WT	Rep2	48	4.41E+10
UBB;UBC;UBA52;RPS27A_(K63)	Intensity.WT	Rep2	63	1.09E+10
UBB;UBC;RPS27A;UBA52_(K6)	Intensity.WT	Rep2	6	2.10E+07
UBB;UBC;RPS27A;UBA52_(K11)	Intensity.WT	Rep2	11	8.36E+09
UBB;UBC;RPS27A;UBA52_(K27)	Intensity.WT	Rep2	27	3.93E+07
UBB;UBC;RPS27A;UBA52_(K29)	Intensity.WT	Rep3	29	2.31E+08
UBB;UBC;RPS27A;UBA52_(K33)	Intensity.WT	Rep3	33	1.42E+07
UBB;UBC;UBA52;RPS27A_(K48)	Intensity.WT	Rep3	48	3.92E+10
UBB;UBC;UBA52;RPS27A_(K63)	Intensity.WT	Rep3	63	8.74E+09
UBB;UBC;RPS27A;UBA52_(K6)	Intensity.WT	Rep3	6	7.69E+07
UBB;UBC;RPS27A;UBA52_(K11)	Intensity.WT	Rep3	11	8.43E+09
UBB;UBC;RPS27A;UBA52_(K27)	Intensity.WT	Rep3	27	3.93E+07
UBB;UBC;RPS27A;UBA52_(K29)	Intensity.WT	Rep4	29	4.61E+07
UBB;UBC;RPS27A;UBA52_(K33)	Intensity.WT	Rep4	33	1.42E+07
UBB;UBC;UBA52;RPS27A_(K48)	Intensity.WT	Rep4	48	3.88E+10
UBB;UBC;UBA52;RPS27A_(K63)	Intensity.WT	Rep4	63	1.30E+10
UBB;UBC;RPS27A;UBA52_(K6)	Intensity.WT	Rep4	6	5.91E+07
UBB;UBC;RPS27A;UBA52_(K11)	Intensity.WT	Rep4	11	8.53E+09
UBB;UBC;RPS27A;UBA52_(K27)	Intensity.WT	Rep4	27	4.73E+08
UBB;UBC;RPS27A;UBA52_(K6)	Intensity.K6R	Rep1	6	5.63E+03
UBB;UBC;RPS27A;UBA52_(K6)	Intensity.K6R	Rep2	6	3.33E+03
UBB;UBC;RPS27A;UBA52_(K6)	Intensity.K6R	Rep3	6	4.82E+03
UBB;UBC;RPS27A;UBA52_(K6)	Intensity.K6R	Rep4	6	6.09E+03
UBB;UBC;RPS27A;UBA52_(K11)	Intensity.K11R	Rep1	11	2.24E+04
UBB;UBC;RPS27A;UBA52_(K11)	Intensity.K11R	Rep2	11	3.02E+03
UBB;UBC;RPS27A;UBA52_(K11)	Intensity.K11R	Rep3	11	5.22E+03
UBB;UBC;RPS27A;UBA52_(K11)	Intensity.K11R	Rep4	11	5.46E+03
UBB;UBC;RPS27A;UBA52_(K27)	Intensity.K27R	Rep1	27	2.20E+03
UBB;UBC;RPS27A;UBA52_(K27)	Intensity.K27R	Rep2	27	4.16E+03
UBB;UBC;RPS27A;UBA52_(K27)	Intensity.K27R	Rep3	27	3.71E+03
UBB;UBC;RPS27A;UBA52_(K27)	Intensity.K27R	Rep4	27	5.48E+03
UBB;UBC;RPS27A;UBA52_(K29)	Intensity.K29R	Rep1	29	2.47E+03
UBB;UBC;RPS27A;UBA52_(K29)	Intensity.K29R	Rep2	29	3.48E+03
UBB;UBC;RPS27A;UBA52_(K29)	Intensity.K29R	Rep3	29	2.45E+03
UBB;UBC;RPS27A;UBA52_(K29)	Intensity.K29R	Rep4	29	3.70E+03
UBB;UBC;RPS27A;UBA52_(K33)	Intensity.K33R	Rep1	33	3.48E+02
UBB;UBC;RPS27A;UBA52_(K33)	Intensity.K33R	Rep2	33	7.09E+03
UBB;UBC;RPS27A;UBA52_(K33)	Intensity.K33R	Rep3	33	8.18E+03
UBB;UBC;RPS27A;UBA52_(K33)	Intensity.K33R	Rep4	33	5.89E+03
UBB;UBC;UBA52;RPS27A_(K48)	Intensity.K48R_48h	Rep1	48	1.33E+04
UBB;UBC;UBA52;RPS27A_(K48)	Intensity.K48R_48h	Rep2	48	1.28E+04
UBB;UBC;UBA52;RPS27A_(K48)	Intensity.K48R_48h	Rep3	48	2.67E+04
UBB;UBC;UBA52;RPS27A_(K48)	Intensity.K48R_48h	Rep4	48	1.53E+04
UBB;UBC;UBA52;RPS27A_(K63)	Intensity.K63R	Rep1	63	4.69E+03
UBB;UBC;UBA52;RPS27A_(K63)	Intensity.K63R	Rep2	63	4.69E+03
UBB;UBC;UBA52;RPS27A_(K63)	Intensity.K63R	Rep3	63	4.69E+03
UBB;UBC;UBA52;RPS27A_(K63)	Intensity.K63R	Rep4	63	4.69E+03
