# Supplementary material for: Functional landscape of ubiquitin linkages couples K29-linked ubiquitylation to epigenome integrity
Source: EMBO J. 2025 Oct 22;44(23):6944–78. doi: 10.1038/s44318-025-00599-7 (PMC12669653; doi:10.1038/s44318-025-00599-7)
Supplement: Supplementary file 6 — Dataset EV4 [file 44318_2025_599_MOESM6_ESM.xlsx]

## Sheet: Description
Dataset EV4
High-content microscopy siRNA screen to assay K29-ubiquitylation in U2OS cells
Cells were seeded and siRNA transfected (50nM) at 24 and 48 hours post seeding
Plates were fixed 72 hours after initial transfection prior to staining with sAB-K29 and DAPI
Each transfection was imaged multiple times cells identified using a DAPI based mask. Mean nuclear intensity of sAB-K29 labelling was calculated for each cell which was then averaged for each siRNA and normalized to a non-targetting control (siMM1).
Z-score was also calculated as (value-mean)/standard deviation.
Combined screen' tab shows average of raw data, normalized values shown in Figure 4 and Z-scores.
Contact Horizon Discovery for siRNA sequences
G-105615 Lot no. 21106
G-105625 Lot no. 21107
G-105635 Lot no. 21105

## Sheet: Combined screen
siRNA	Avg(Mean Intensity 568)	Mean Intensity 568 normalized	Z-Score			Pop. Mean	Std. Dev.
PHF1	33.5675	2.49086	7.24481			16.4069	2.36867
FBXW4	27.9347	2.07288	4.86677
MDM2	27.4872	2.03968	4.67784
KMT2B	24.4349	1.81318	3.38923
CHD4	24.1586	1.79269	3.27262
CISH	23.9619	1.77809	3.18956
MDM4	23.4995	1.74378	2.99435
FBXW10	23.0754	1.7123	2.81528
BARD1	22.9719	1.70462	2.77159
KRTAP5-9	22.7713	1.68974	2.68691
NEURL1	22.6586	1.68137	2.63931
TRIM6-TRIM34	22.6539	1.68102	2.63734
MNAT1	22.3059	1.6552	2.49042
BRCA1	21.952	1.62894	2.341
AMFR	21.8016	1.61778	2.27754
MID1	21.7595	1.61466	2.25974
BIRC2	21.7233	1.61197	2.24447
AIRE	21.7225	1.61191	2.24412
CCNF	21.6254	1.60471	2.20313
TRIM23	21.4594	1.59239	2.13305
TRIM21	21.369	1.58568	2.09488
RBBP6	21.2771	1.57886	2.0561
TRIM27	21.0882	1.56484	1.97634
KDM2A	21.0859	1.56468	1.97539
FBXO39	21.0567	1.5625	1.96302
BMI1	20.6691	1.53374	1.79941
LNX1	20.3871	1.51282	1.68036
RNF4	20.3521	1.51022	1.66559
SOCS3	20.3519	1.5102	1.66548
LMO7	20.338	1.50917	1.6596
PHF21A	20.27	1.50413	1.63094
SYVN1	20.1072	1.49205	1.56219
TRIM45	19.9728	1.48208	1.50546
CCL20	19.921	1.47823	1.48358
CNOT4	19.88	1.47519	1.46628
UNK	19.8165	1.47048	1.43947
RNF148	19.7489	1.46546	1.41091
TRIM25	19.7049	1.4622	1.39234
CBLC	19.6758	1.46004	1.38006
RUFY1	19.6165	1.45564	1.35505
RNF214	19.5713	1.45228	1.33595
PHF5A	19.5589	1.45136	1.33072
RNF186	19.4748	1.44512	1.29519
TRIM15	19.4458	1.44297	1.28295
SKP2	19.3979	1.43941	1.26272
RNF146	19.3777	1.43792	1.25423
RAB40AL	19.3718	1.43748	1.25171
TRIM37	19.363	1.43683	1.248
TRIM60	19.2675	1.42974	1.20768
MLLT6	19.2622	1.42935	1.20545
RNF141	19.2273	1.42676	1.19072
PCGF2	19.2123	1.42564	1.18436
MARCH5	19.1439	1.42057	1.1555
KDM5C	19.1349	1.4199	1.15172
TRIM72	19.1325	1.41972	1.1507
ASB5	19.1283	1.41941	1.14891
TRIM14	19.0687	1.41499	1.12376
HR	19.0502	1.41361	1.11594
MEFV	19.0293	1.41206	1.10712
SOCS1	19.0242	1.41168	1.10495
HRC	19.0229	1.41159	1.10443
JADE1	18.9777	1.40824	1.08535
CBL	18.9645	1.40725	1.07976
FBXO22	18.9073	1.40301	1.05561
RFPL4A	18.8571	1.39929	1.03443
RFWD3	18.8249	1.39689	1.02082
FBXL7	18.7626	1.39227	0.994508
FBXO46	18.7486	1.39123	0.988604
KMT2D	18.7323	1.39002	0.981733
PRICKLE3	18.7196	1.38909	0.976391
ASB10	18.7083	1.38825	0.971613
RNF175	18.7035	1.38789	0.969587
ASB18	18.679	1.38607	0.959222
UBE2D3	18.6699	1.38539	0.955381
CHFR	18.6674	1.38521	0.954322
PCGF6	18.5771	1.37851	0.916215
RNF43	18.575	1.37835	0.915324
BAHD1	18.5569	1.37701	0.907707
PHF19	18.5369	1.37553	0.899258
DTX3	18.5326	1.37521	0.897443
ARIH1	18.5095	1.37349	0.887684
MSL2	18.4826	1.37149	0.8763
ASB17	18.4428	1.36854	0.859529
TRIM28	18.4404	1.36836	0.858483
DPF2	18.4076	1.36593	0.844673
MKRN3	18.406	1.36581	0.843983
UBE4B	18.3893	1.36457	0.83691
MARCH6	18.3651	1.36278	0.826704
FBXO24	18.3617	1.36252	0.825261
SIAH2	18.3545	1.36199	0.822239
FBXO2	18.3258	1.35986	0.810111
TRIM26	18.3218	1.35956	0.808414
TRIM49C	18.2874	1.35701	0.793908
TRIM73	18.2777	1.35629	0.789803
BRPF3	18.2751	1.3561	0.788714
FBXL14	18.2606	1.35502	0.78259
ASB14	18.2523	1.35441	0.779106
FBXO43	18.2391	1.35343	0.77353
TRIM17	18.2209	1.35208	0.765851
RNF168	18.21	1.35127	0.761229
PARK2	18.1881	1.34964	0.751968
SOCS2	18.1877	1.34961	0.751829
PHF3	18.183	1.34926	0.749819
RNF34	18.1581	1.34742	0.739316
PDC	18.1044	1.34343	0.716638
ASB4	18.0985	1.343	0.714174
TRIM68	18.0822	1.34178	0.707264
RFPL4AL1	18.0778	1.34145	0.705404
TRIM31	18.0519	1.33953	0.69447
RNF39	18.0355	1.33832	0.687563
TRIM54	18.015	1.3368	0.678902
FBXW11	18.0138	1.33671	0.678382
MIB1	18.0118	1.33656	0.677566
CBLB	18.0088	1.33634	0.676297
RFPL2	18.0022	1.33585	0.673514
WSB1	17.9754	1.33386	0.662179
SYTL4	17.9707	1.33351	0.660209
RING1	17.9406	1.33128	0.647507
RNF7	17.9217	1.32988	0.639533
PML	17.8675	1.32585	0.616651
TRIM74	17.845	1.32419	0.607151
PHF10	17.8394	1.32377	0.604772
VPS41	17.828	1.32292	0.599948
TRIM62	17.8228	1.32254	0.59777
RFPL4B	17.79	1.3201	0.583924
FBXL16	17.7661	1.31833	0.57382
PJA1	17.7391	1.31632	0.562417
TRIM55	17.7354	1.31605	0.560872
XIAP	17.7024	1.3136	0.546946
PHF23	17.6831	1.31217	0.538804
ZNF645	17.668	1.31105	0.532427
TRIM39	17.6493	1.30966	0.524531
RNF122	17.6226	1.30768	0.513257
RFPL1	17.5658	1.30346	0.48925
FBXO15	17.5358	1.30124	0.476617
DZIP3	17.5281	1.30067	0.47336
RNF126	17.5109	1.29939	0.466082
RNF31	17.5094	1.29928	0.465445
RSPRY1	17.4994	1.29854	0.461238
FBXO28	17.4879	1.29768	0.456374
MTF2	17.4855	1.29751	0.45537
PHF11	17.4732	1.2966	0.450188
FBXO11	17.4596	1.29559	0.444438
FBXO21	17.449	1.2948	0.439951
RNF207	17.4489	1.29479	0.439935
SOCS4	17.4426	1.29433	0.437267
FBXL8	17.4367	1.29389	0.434772
MARCH2	17.4205	1.29268	0.427924
CHD5	17.4113	1.292	0.424043
MEX3B	17.4067	1.29166	0.422118
RNF130	17.3958	1.29085	0.417488
ZNRF2	17.388	1.29027	0.4142
ASB3	17.3857	1.2901	0.413239
FBXL3	17.3754	1.28934	0.408902
RNF145	17.3751	1.28932	0.408776
SOCS7	17.3631	1.28842	0.403693
TRAF3	17.3459	1.28714	0.396411
ASB12	17.3347	1.28632	0.391705
LRRC29	17.3245	1.28556	0.38741
TRAF5	17.3244	1.28555	0.387368
TRIM49B	17.3202	1.28524	0.38559
ZNRF3	17.2973	1.28354	0.375893
PHF12	17.2927	1.2832	0.373964
BAZ2B	17.2923	1.28317	0.373812
BIRC3	17.2871	1.28278	0.371592
PRICKLE2	17.2848	1.28261	0.370621
CXXC1	17.2764	1.28199	0.367099
FBXO27	17.2743	1.28184	0.366222
RNF133	17.2663	1.28124	0.362829
MARCH8	17.2288	1.27846	0.346993
MARCH10	17.2285	1.27844	0.346874
MARCH4	17.2257	1.27823	0.345677
ASB9	17.2099	1.27706	0.33902
WHSC1	17.1839	1.27513	0.328055
RNF220	17.1772	1.27463	0.325228
RNF222	17.1768	1.2746	0.325037
LONRF2	17.1752	1.27448	0.324355
RLIM	17.1667	1.27385	0.320793
TRAF4	17.1418	1.272	0.310252
SMURF1	17.1343	1.27145	0.307095
FBXO33	17.1104	1.26967	0.296993
PCGF3	17.0985	1.26879	0.291972
RNF216	17.0875	1.26797	0.287337
BFAR	17.0785	1.26731	0.283547
RNF113B	17.0707	1.26673	0.280244
RNF144B	17.0692	1.26662	0.279628
FBXO8	17.0661	1.26638	0.278302
ZMYND11	17.0648	1.26629	0.277741
BAZ1B	17.0617	1.26606	0.276436
FBXO10	17.0569	1.2657	0.2744
ARIH2	17.0295	1.26367	0.262844
RNF111	17.0255	1.26337	0.261179
FBXO36	17.0204	1.26299	0.259
FBXO48	17.0166	1.26271	0.257402
TRIM64	17.0117	1.26235	0.255345
RNF14	17.0057	1.26191	0.252822
TTC3	16.9957	1.26116	0.248567
TRAF6	16.9879	1.26058	0.245284
TRIM49	16.9691	1.25919	0.237367
VPS11	16.9612	1.2586	0.234035
PCGF1	16.9561	1.25822	0.231874
FBXL5	16.9503	1.25779	0.229434
FSD1L	16.9282	1.25615	0.220088
TRIM6	16.9239	1.25583	0.218283
RBCK1	16.9157	1.25523	0.21483
MYLIP	16.907	1.25458	0.211155
RNF24	16.9058	1.25449	0.210609
PEX10	16.9	1.25406	0.2082
RAB40B	16.8962	1.25378	0.206591
MEX3C	16.8801	1.25258	0.199771
TRIM42	16.877	1.25235	0.198457
RFFL	16.8739	1.25212	0.197142
HLTF	16.8504	1.25038	0.187255
JADE3	16.8397	1.24959	0.18273
RNF215	16.8393	1.24955	0.182541
UBR3	16.8127	1.24758	0.171325
FBXL21	16.8096	1.24735	0.170021
TRIM5	16.8013	1.24673	0.166507
ZNF592	16.7848	1.24551	0.159559
CUL9	16.7837	1.24543	0.159102
RNF152	16.7751	1.24479	0.155437
MEX3A	16.7719	1.24455	0.154093
RFPL3	16.7629	1.24389	0.150319
RNF112	16.7626	1.24386	0.150178
PHF20L1	16.7551	1.2433	0.146995
PHF14	16.734	1.24174	0.138117
RNF114	16.728	1.2413	0.13556
RNF169	16.726	1.24115	0.134725
DTX1	16.7149	1.24032	0.130033
ASB1	16.7103	1.23998	0.128099
MARCH11	16.7015	1.23933	0.124358
LNX2	16.7014	1.23932	0.12432
MID2	16.7005	1.23925	0.123949
TRIM77	16.6962	1.23893	0.122126
RNF181	16.6898	1.23846	0.119424
FBXO25	16.6867	1.23824	0.118151
RNF144A	16.6793	1.23768	0.115018
TRIM10	16.6754	1.23739	0.11335
SOCS5	16.6667	1.23675	0.109704
TRIM11	16.6529	1.23572	0.103854
RNF40	16.6466	1.23526	0.101214
PHF6	16.6015	1.23191	0.0821575
FBXO9	16.5879	1.2309	0.0764007
OIT3	16.5768	1.23008	0.0717506
RNF25	16.5559	1.22853	0.0629276
BTRC	16.5517	1.22821	0.0611163
MUL1	16.5466	1.22783	0.0589732
MARCH3	16.5402	1.22736	0.0562635
RNF149	16.4988	1.22429	0.0388246
FBXO45	16.494	1.22393	0.0367723
RNF20	16.4909	1.22371	0.0354866
UBE2C	16.4787	1.2228	0.0303377
RNF217	16.4777	1.22272	0.0298813
RNF121	16.4744	1.22248	0.0284893
RNF5	16.4456	1.22034	0.0163518
RCHY1	16.442	1.22007	0.014812
RNF135	16.4371	1.21971	0.0127549
TRIM56	16.433	1.2194	0.0110153
CUL3	16.4288	1.21909	0.00923421
LGR6	16.4271	1.21897	0.00853081
TRIM50	16.4197	1.21842	0.00542179
KDM5D	16.4181	1.2183	0.00474669
RNF113A	16.3955	1.21662	-0.0047986
FBXL13	16.3948	1.21657	-0.00510756
NEURL2	16.3734	1.21498	-0.0141451
FBXW7	16.3653	1.21438	-0.0175695
ZFAND5	16.3579	1.21383	-0.0206945
FBXL22	16.3503	1.21327	-0.0238874
ASB6	16.336	1.21221	-0.029915
WDR24	16.3278	1.2116	-0.033404
FBXO30	16.3224	1.2112	-0.0356771
JADE2	16.316	1.21072	-0.0383658
TRIM41	16.2961	1.20925	-0.046751
UBE4A	16.2873	1.2086	-0.0504732
VPS18	16.2817	1.20818	-0.052854
TRIM4	16.275	1.20768	-0.0556747
UBR2	16.2725	1.20749	-0.0567529
MEX3D	16.2641	1.20687	-0.0602944
UHRF2	16.2572	1.20636	-0.0632083
PHF20	16.2561	1.20628	-0.0636718
TRIM59	16.2504	1.20586	-0.0660528
PPIL2	16.2479	1.20567	-0.0671391
THNSL2	16.242	1.20523	-0.069625
RNF44	16.2332	1.20458	-0.0733148
RNF8	16.2293	1.20429	-0.0749606
ASB2	16.2286	1.20424	-0.0752526
VPS8	16.2282	1.20421	-0.075422
UBE2K	16.2214	1.20371	-0.0782965
FBXO34	16.2178	1.20343	-0.0798447
ZNF547	16.2134	1.20311	-0.0816857
RNF219	16.2078	1.20269	-0.0840597
KDM5B	16.1889	1.20129	-0.0920262
FBXO44	16.1848	1.20099	-0.0937599
LONRF1	16.1476	1.19822	-0.109482
RNF167	16.1433	1.19791	-0.111264
TRIM58	16.136	1.19737	-0.114359
RNF208	16.1334	1.19717	-0.115464
DCUN1D3	16.1132	1.19568	-0.123987
RC3H2	16.1108	1.1955	-0.124985
RAB40C	16.1057	1.19512	-0.127144
ASB11	16.0951	1.19433	-0.131621
INTS12	16.0886	1.19385	-0.13439
RNF170	16.0485	1.19088	-0.151296
LRSAM1	16.0277	1.18933	-0.160103
NSD1	16.0171	1.18855	-0.164542
FBXL20	16.0129	1.18824	-0.166317
RNF32	15.9998	1.18726	-0.171846
SYTL3	15.9848	1.18615	-0.178201
UHRF1	15.9837	1.18607	-0.178653
ZFAND6	15.9799	1.18578	-0.180268
RAG1	15.9772	1.18558	-0.181416
HECTD1	15.9749	1.18541	-0.182373
TRIM2	15.9718	1.18518	-0.183696
PHF2	15.9693	1.185	-0.184743
TRIM71	15.9373	1.18262	-0.198252
PDZRN3	15.9337	1.18236	-0.199754
UBE2NL	15.909	1.18052	-0.210184
UBE2D2	15.9085	1.18049	-0.21041
TRIM52	15.9042	1.18017	-0.212228
RNF166	15.8858	1.1788	-0.219976
DPF1	15.8798	1.17836	-0.222517
ASB13	15.8701	1.17763	-0.226634
TRIM65	15.8676	1.17745	-0.227687
TOPORS	15.8637	1.17716	-0.229332
FBXO7	15.8507	1.1762	-0.234803
RSF1	15.8413	1.1755	-0.238791
FBXL15	15.8278	1.1745	-0.244472
FBXO41	15.8095	1.17314	-0.252186
ANKIB1	15.8094	1.17313	-0.252247
FBXL2	15.804	1.17273	-0.254534
UBE3C	15.7851	1.17133	-0.262495
TRIM43B	15.7843	1.17127	-0.262841
RNF151	15.768	1.17006	-0.269731
TRIM38	15.7633	1.16971	-0.271698
HERC6	15.7572	1.16926	-0.274275
TRIM63	15.7556	1.16914	-0.27496
RNF180	15.7377	1.16781	-0.282502
DCUN1D1	15.731	1.16732	-0.285333
PJA2	15.7223	1.16667	-0.289013
PAAF1	15.7217	1.16662	-0.289284
RNF139	15.7028	1.16522	-0.297256
WSB2	15.7017	1.16514	-0.297699
BIRC7	15.6914	1.16437	-0.302081
MKRN1	15.685	1.1639	-0.304755
FBXO47	15.682	1.16368	-0.306017
PDZRN4	15.6772	1.16332	-0.308052
G2E3	15.6743	1.16311	-0.309289
RNF17	15.6732	1.16303	-0.30974
RNF2	15.672	1.16293	-0.310268
TRIML1	15.6647	1.1624	-0.313324
LPXN	15.6585	1.16194	-0.315936
PATZ1	15.6557	1.16173	-0.31713
FBXL19	15.6537	1.16158	-0.317988
TRIM40	15.6323	1.15999	-0.327033
RFWD2	15.629	1.15975	-0.328396
KDM1B	15.6228	1.15928	-0.331044
TULP4	15.6227	1.15928	-0.33106
RNF41	15.6211	1.15916	-0.331755
UBE2S	15.5988	1.15751	-0.341149
TRIM51	15.5925	1.15704	-0.343799
MGRN1	15.5917	1.15697	-0.344168
RNF183	15.5864	1.15659	-0.346375
RNF6	15.5793	1.15606	-0.349385
TRIM61	15.5722	1.15553	-0.352372
ASB15	15.5675	1.15518	-0.354383
NHLRC1	15.5434	1.1534	-0.364529
RNF185	15.539	1.15307	-0.366411
RNF10	15.5298	1.15239	-0.370268
SPSB3	15.528	1.15225	-0.371066
WHSC1L1	15.525	1.15203	-0.372324
FBXO5	15.5171	1.15144	-0.375651
PHF7	15.5159	1.15135	-0.376169
RNF182	15.5111	1.151	-0.37817
OTUD7B	15.4866	1.14918	-0.388511
PCGF5	15.4815	1.1488	-0.390661
ISL1	15.48	1.14869	-0.391294
BRAP	15.4671	1.14773	-0.396763
FBXO31	15.4649	1.14757	-0.397691
TRIM64C	15.4634	1.14746	-0.398299
CBLL1	15.438	1.14558	-0.409024
FBXW12	15.4368	1.14548	-0.409568
UBE2L3	15.4364	1.14545	-0.409734
ZSWIM2	15.4327	1.14518	-0.411276
MIB2	15.4303	1.145	-0.412272
BIRC8	15.4179	1.14408	-0.417526
RAB40A	15.4148	1.14385	-0.418844
UBOX5	15.3873	1.14181	-0.430458
MARCH7	15.3863	1.14174	-0.430867
RNF103	15.3828	1.14148	-0.432339
TRIM46	15.3516	1.13916	-0.445537
TRIM3	15.3273	1.13736	-0.455775
RNF138	15.3243	1.13714	-0.457031
RNF165	15.3216	1.13694	-0.458181
SPSB2	15.318	1.13666	-0.459722
RNFT1	15.3126	1.13627	-0.461963
HERC5	15.3037	1.13561	-0.465736
MARCH9	15.3023	1.1355	-0.466332
FBXO3	15.2795	1.13381	-0.475956
KDM7A	15.248	1.13147	-0.48925
TRIM67	15.2378	1.13072	-0.493559
CGRRF1	15.2267	1.12989	-0.498261
FBXW5	15.2248	1.12975	-0.499057
ZNF330	15.2192	1.12934	-0.501395
WDR59	15.2179	1.12924	-0.501973
MLLT10	15.215	1.12903	-0.503175
BIRC6	15.1954	1.12757	-0.511477
MKRN2	15.1774	1.12624	-0.519048
DTX4	15.1718	1.12582	-0.521438
SOCS6	15.17	1.12568	-0.522196
KMT2C	15.1686	1.12558	-0.522772
RNF125	15.158	1.12479	-0.527255
PRPF19	15.156	1.12465	-0.528091
PEX2	15.1525	1.12439	-0.529561
NLRC5	15.1474	1.12401	-0.531744
FBXL12	15.1462	1.12392	-0.532227
SH3RF1	15.1456	1.12387	-0.532488
SHPRH	15.1429	1.12367	-0.533625
FBXL17	15.1414	1.12356	-0.534252
RNF128	15.1393	1.12341	-0.535141
FBXL4	15.1345	1.12305	-0.537161
FBXO32	15.1264	1.12245	-0.540587
TNFAIP3	15.1193	1.12192	-0.543599
RNF157	15.1111	1.12131	-0.547057
RNF19A	15.0933	1.11999	-0.554565
TRIM47	15.087	1.11953	-0.557233
MAP3K1	15.065	1.11789	-0.566512
WDSUB1	15.0648	1.11788	-0.566594
TRIM32	15.0625	1.11771	-0.567568
UBE2Z	15.061	1.1176	-0.568188
MYCBP2	15.0405	1.11608	-0.576849
PRICKLE4	15.0321	1.11545	-0.580404
UBE2N	15.0279	1.11514	-0.582166
FBXW2	15.012	1.11396	-0.588885
CALCOCO2	15.0098	1.1138	-0.589811
MARCH1	15.0087	1.11372	-0.590269
FBXO42	14.9988	1.11298	-0.594465
RNF213	14.996	1.11278	-0.595629
ASB8	14.9896	1.1123	-0.59835
FBXO40	14.9764	1.11132	-0.603912
STUB1	14.9716	1.11096	-0.605944
PRICKLE1	14.9558	1.10979	-0.612596
FBXW8	14.9176	1.10696	-0.628736
TRAIP	14.9058	1.10608	-0.633707
TRIM35	14.8761	1.10388	-0.646265
DPF3	14.8693	1.10337	-0.649122
FBXL6	14.8523	1.10211	-0.656295
CUL2	14.8414	1.1013	-0.660915
SH3RF2	14.837	1.10097	-0.662778
ARIH1	14.8328	1.10067	-0.664532
HERC1	14.8163	1.09944	-0.671501
TRIM29	14.8123	1.09914	-0.67321
SPSB1	14.7988	1.09814	-0.678879
CUL7	14.7973	1.09803	-0.679544
UBE2A	14.7916	1.09761	-0.681918
LONRF3	14.781	1.09682	-0.686428
TRIM69	14.7453	1.09417	-0.70149
HUWE1	14.7351	1.09341	-0.705804
RNF115	14.7142	1.09186	-0.714622
RNF13	14.711	1.09163	-0.715966
SH3RF3	14.6694	1.08854	-0.733543
SMURF2	14.6637	1.08812	-0.735931
ZNF185	14.6631	1.08807	-0.736176
NEDD4L	14.646	1.0868	-0.743417
FBXO38	14.637	1.08613	-0.747211
PHF8	14.6365	1.0861	-0.747419
UBR1	14.5987	1.08329	-0.763381
TRIM43	14.5866	1.08239	-0.768497
DTX2	14.568	1.08102	-0.776318
FBXL18	14.5458	1.07937	-0.785713
SCEL	14.52	1.07745	-0.796614
ZNRF1	14.5095	1.07668	-0.801018
RNF150	14.469	1.07367	-0.818117
LMTK3	14.4633	1.07324	-0.820538
TRIM33	14.4488	1.07217	-0.826659
RNF11	14.4341	1.07107	-0.832883
FBXO18	14.4257	1.07045	-0.836415
UBE2F	14.3757	1.06674	-0.85752
TRIM22	14.3592	1.06552	-0.864501
PHRF1	14.3513	1.06494	-0.867812
FBXO6	14.3444	1.06442	-0.870745
UBE2T	14.3264	1.06309	-0.878334
IRF2BP1	14.3164	1.06235	-0.88254
UBA5	14.3081	1.06173	-0.886071
UBE2V2	14.2981	1.06099	-0.890263
CACUL1	14.2943	1.06071	-0.891873
HECTD3	14.2794	1.0596	-0.898175
UBE2Q1	14.2709	1.05897	-0.901745
RNFT2	14.2613	1.05825	-0.905836
FBXO16	14.2449	1.05704	-0.912749
TRAF7	14.2444	1.057	-0.912973
HERC3	14.234	1.05623	-0.917327
TRIM13	14.2335	1.05619	-0.917566
HACE1	14.2024	1.05388	-0.930701
HERC2	14.1503	1.05002	-0.95268
HECTD4	14.1439	1.04954	-0.955395
RNF123	14.1349	1.04888	-0.959162
FBXO4	14.1233	1.04802	-0.964057
RC3H1	14.1162	1.04749	-0.967066
UBE2Q2	14.1138	1.04731	-0.968109
TSG101	14.0663	1.04378	-0.988155
CDC34	14.0481	1.04244	-0.995816
UBE2U	14.0442	1.04214	-0.997478
ASB7	14.0231	1.04058	-1.00636
UBE2G2	13.9929	1.03834	-1.01914
RNF19B	13.9864	1.03785	-1.02189
RAD18	13.9801	1.03739	-1.02452
HERC4	13.9744	1.03697	-1.02693
FBXO17	13.9708	1.0367	-1.02845
TRIL	13.9693	1.03659	-1.02909
UBE2I	13.9345	1.03401	-1.04377
TRIM8	13.9344	1.034	-1.04381
TRIM48	13.9179	1.03277	-1.05079
CAND2	13.9104	1.03222	-1.05395
UEVLD	13.8923	1.03087	-1.0616
EEA1	13.89	1.0307	-1.06259
UBA1	13.8541	1.02804	-1.07773
HECW2	13.8505	1.02777	-1.07924
TRIM51GP	13.8405	1.02703	-1.08345
RNF26	13.8393	1.02694	-1.08396
UBE2E2	13.8342	1.02656	-1.08615
UBE2E1	13.8073	1.02457	-1.09749
UBE2O	13.7941	1.02359	-1.10304
LTN1	13.7493	1.02027	-1.12195
UBE3B	13.7368	1.01933	-1.12727
UBE2W	13.7275	1.01865	-1.13117
UBE2J2	13.7218	1.01822	-1.13357
PHF21B	13.6762	1.01484	-1.15284
UBE2V1	13.6652	1.01402	-1.15748
ANAPC11	13.6455	1.01256	-1.1658
UBA7	13.6392	1.01209	-1.16847
FBXW9	13.6365	1.01189	-1.16959
UBR5	13.636	1.01186	-1.1698
AKTIP	13.6281	1.01127	-1.17316
DTX3L	13.589	1.00837	-1.18964
HECTD2	13.4989	1.00168	-1.2277
siMM1	13.4762	1	-1.23725
RAPSN	13.3642	0.991689	-1.28454
DCUN1D5	13.3424	0.990069	-1.29375
HECW1	13.3393	0.989837	-1.29507
NEDD4	13.339	0.989817	-1.29519
BRPF1	13.3349	0.98951	-1.29694
ASB16	13.3318	0.98928	-1.29825
DCUN1D2	13.3151	0.988043	-1.30528
ITCH	13.3148	0.988021	-1.30541
WWP1	13.2971	0.986705	-1.3129
KDM2B	13.2966	0.986671	-1.31308
SPSB4	13.1935	0.979022	-1.3566
TRIM64B	13.0876	0.971162	-1.40132
AREL1	13.084	0.970896	-1.40284
UBE2QL1	13.0525	0.96856	-1.41613
UBE3A	13.0406	0.967673	-1.42117
UBE2R2	12.9879	0.963767	-1.4434
DCUN1D4	12.9466	0.960702	-1.46083
CAND1	12.9392	0.960149	-1.46398
RBX1	12.9384	0.96009	-1.46432
UBE2B	12.9132	0.958219	-1.47496
UBA3	12.8732	0.955249	-1.49186
UBA6	12.787	0.948852	-1.52825
CUL1	12.7326	0.944815	-1.55122
TRIM24	12.6608	0.939488	-1.58153
UBE2H	12.6534	0.938945	-1.58462
UBE2J1	12.6461	0.938399	-1.58772
UBE2D4	12.6323	0.937374	-1.59356
UBE2D1	12.6183	0.936341	-1.59943
UBE2L6	12.6125	0.935908	-1.60189
UBE2G1	12.5174	0.928849	-1.64206
ZNRF4	12.4476	0.923671	-1.67151
CUL4B	12.2255	0.907188	-1.76529
PHF13	12.2185	0.906671	-1.76824
CUL5	12.0925	0.897319	-1.82144
UBE2M	12.0856	0.896806	-1.82436
CUL4A	11.8772	0.881347	-1.91231
NCCRP1	11.783	0.874354	-1.9521
UBE2E3	11.7278	0.870254	-1.97542
RNF38	11.3193	0.839942	-2.14788
TRIP12	6.87569	0.510208	-4.02385
